# Supplementary figures and images for: Smg6/Est1 licenses embryonic stem cell differentiation via nonsense-mediated mRNA decay
Source: PubMed Central journal article supplement — EMBO J. 2015 Mar 14;34(12):1630–47. doi: 10.15252/embj.201489947 (PMC4475398; doi:10.15252/embj.201489947), 2015-03-14

# Related to Supp Fig 6

## Supp Fig 6C

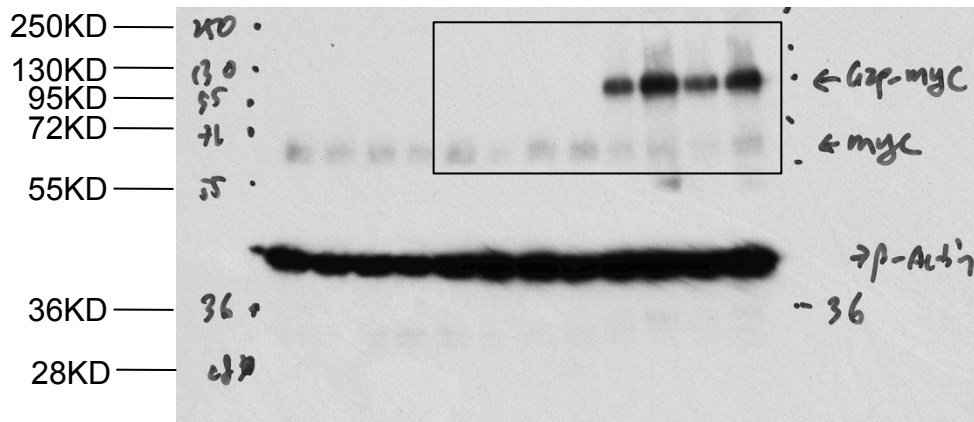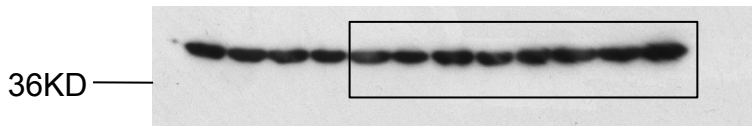

Supp Fig 6E

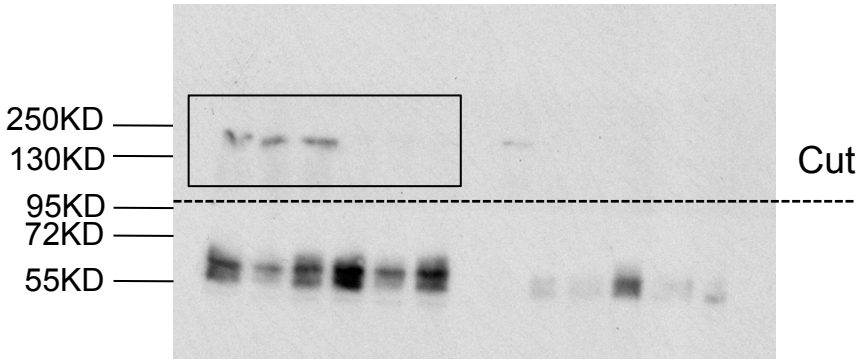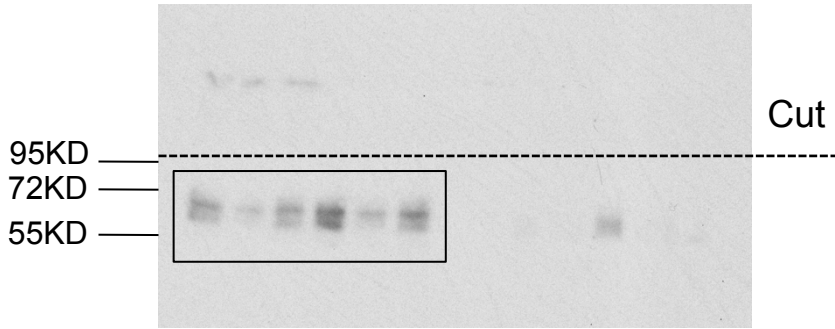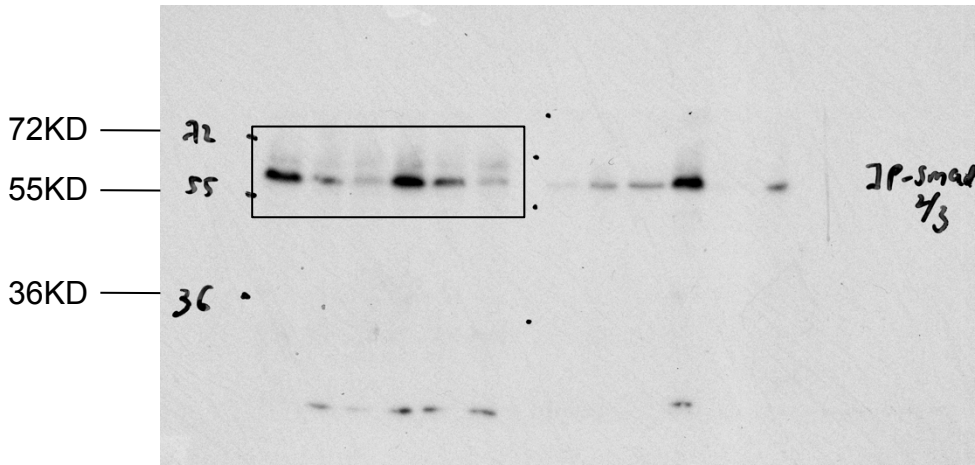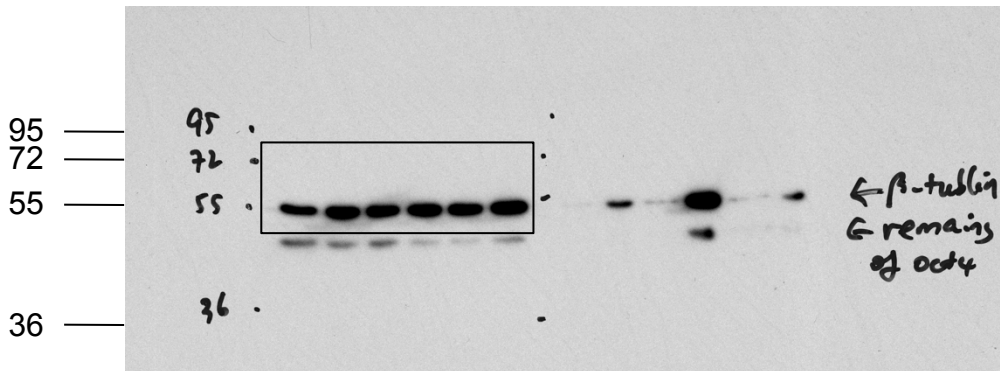

Supp Fig 6H

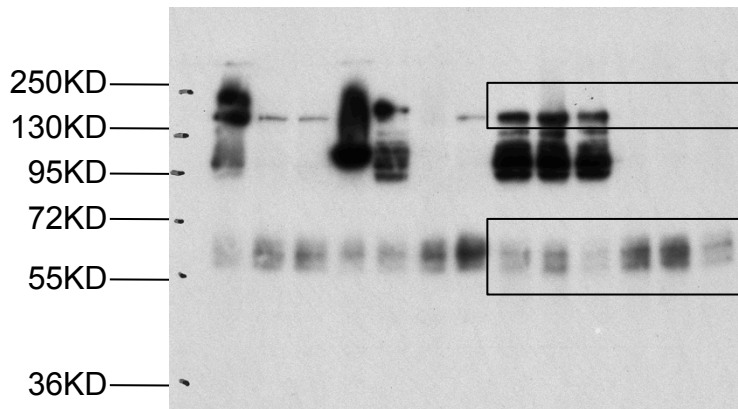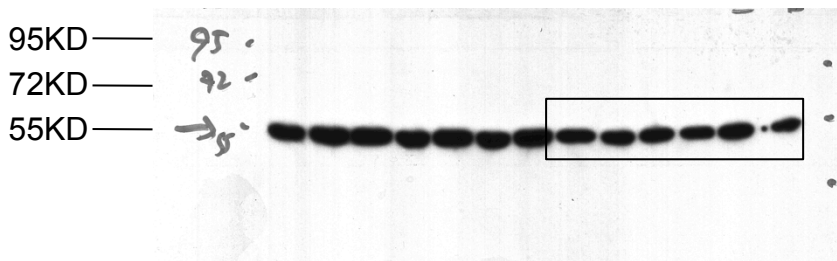

Supplement: embj0034-1630-sd10.pdf [file embj0034-1630-sd10.pdf]

# Related to Supp Fig 7A

Upper panel

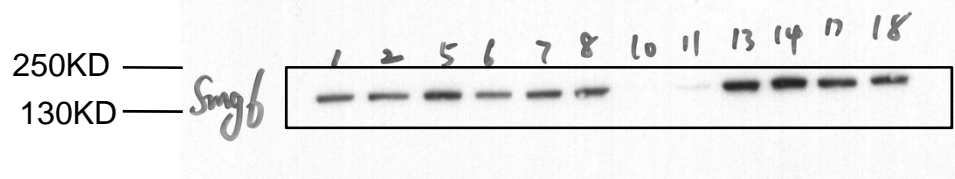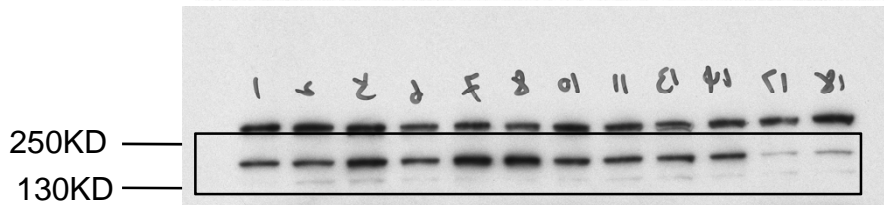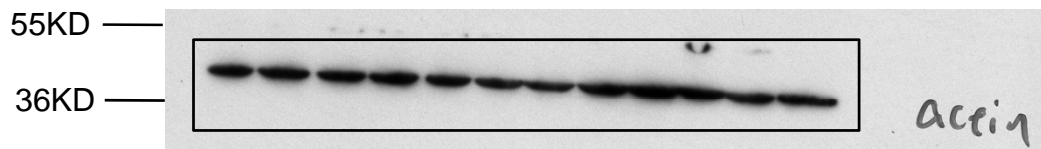

Lower panel

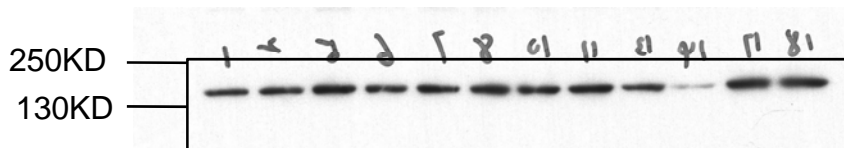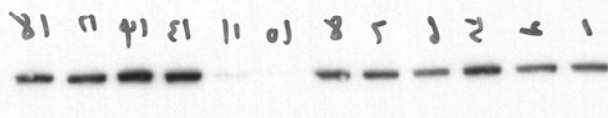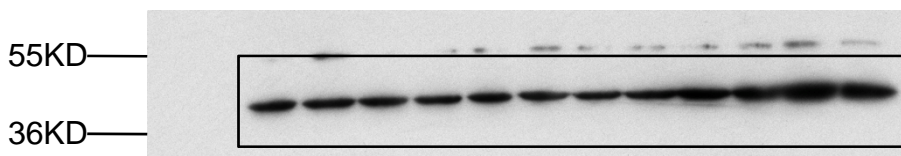

Supplement: embj0034-1630-sd11.pdf [file embj0034-1630-sd11.pdf]

Related to Fig 3C and 3D

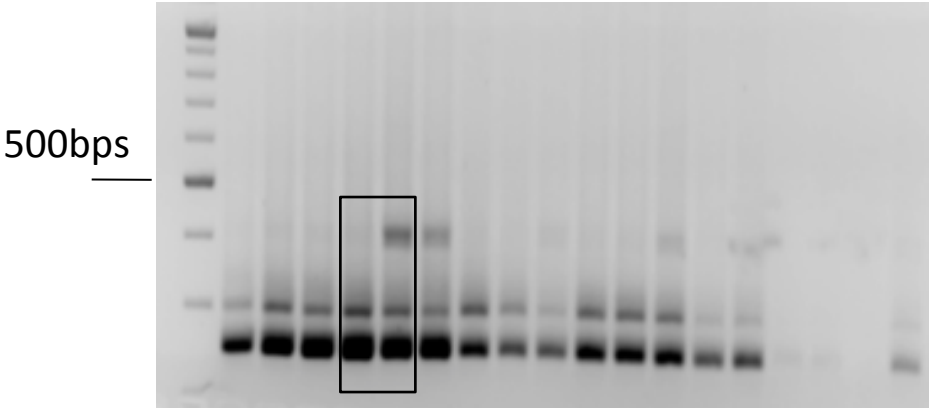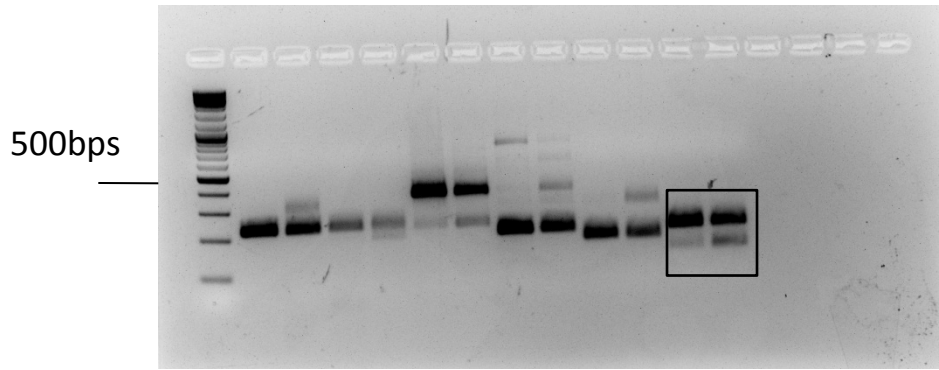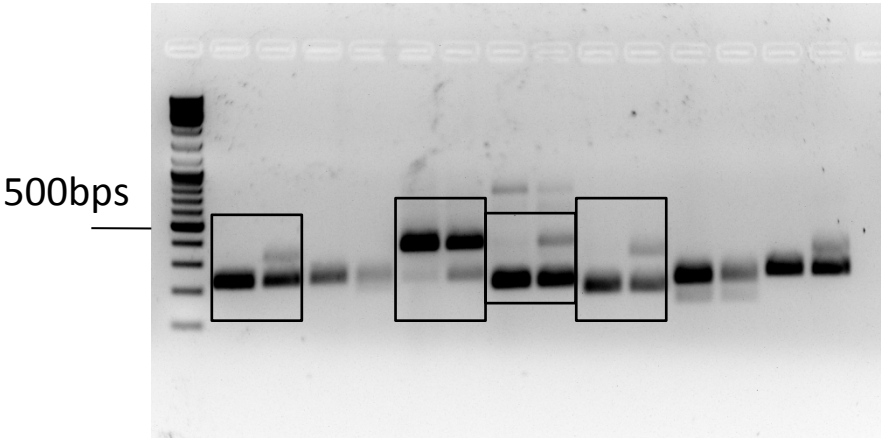

DNA marker SM0331, Thermo Scientific

Supplement: embj0034-1630-sd15.pdf [file embj0034-1630-sd15.pdf]

Related to Figure 4F

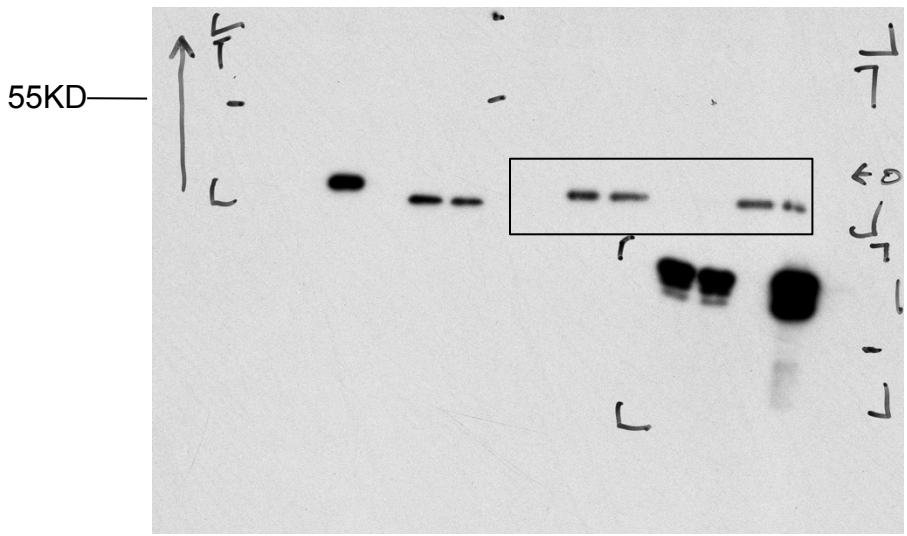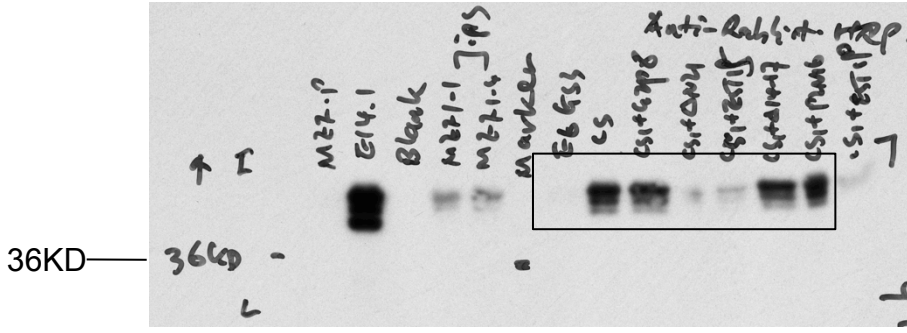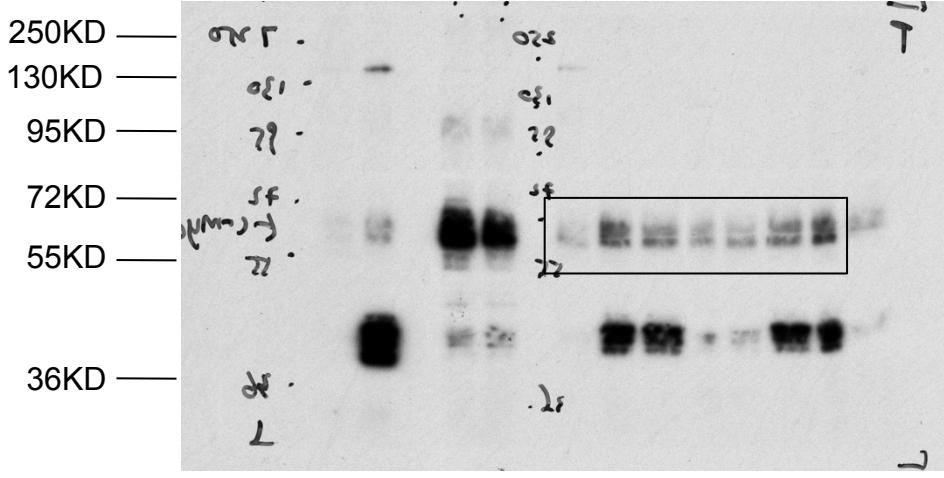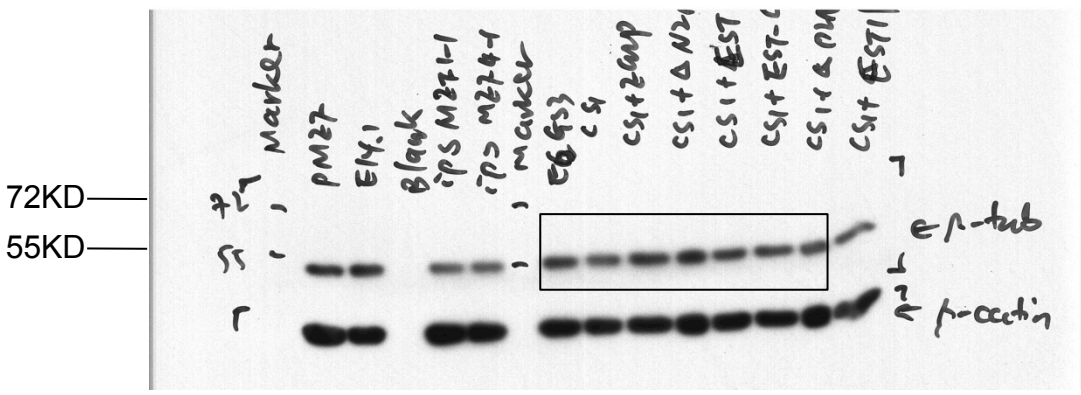

Supplement: embj0034-1630-sd16.pdf [file embj0034-1630-sd16.pdf]

# Related to Fig 5

## Fig 5D

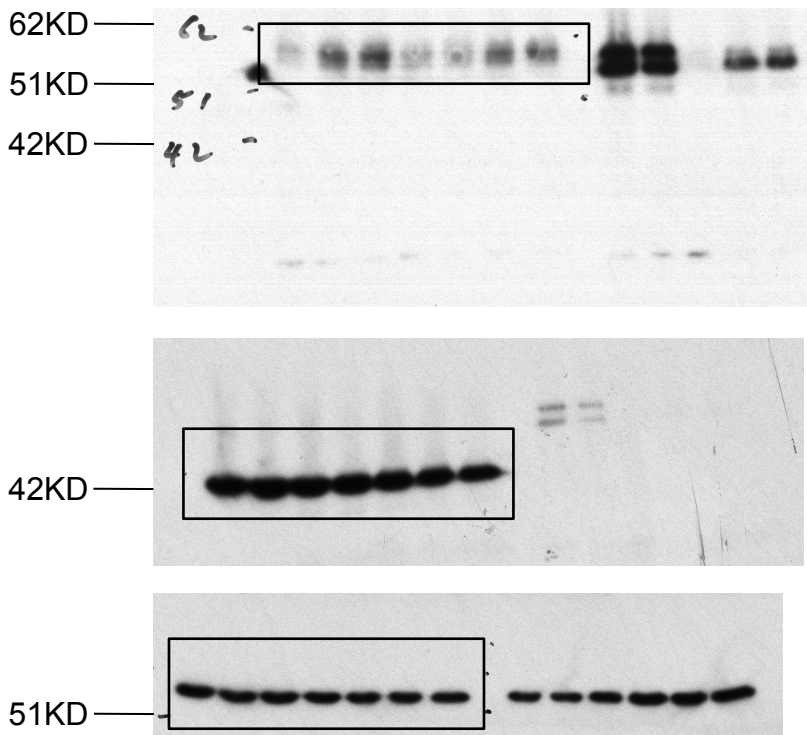

## Fig 5F

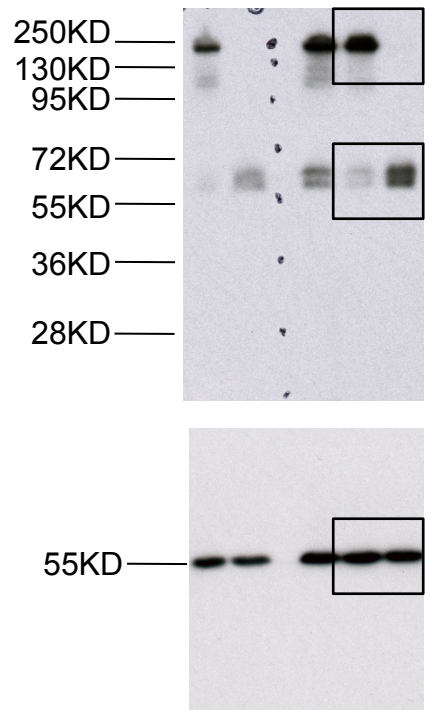

## Fig 5J

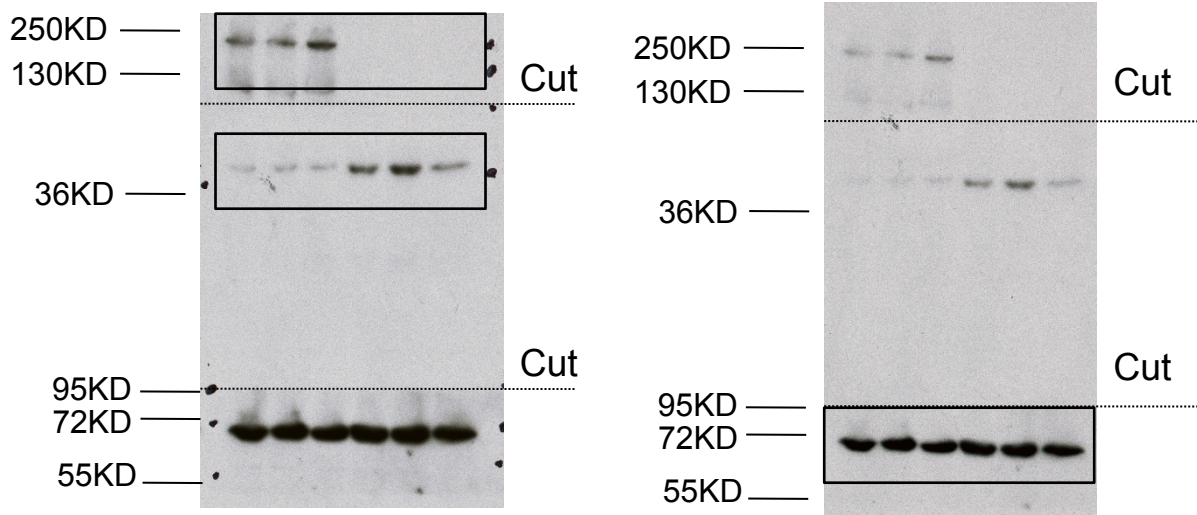

Supplement: embj0034-1630-sd17.pdf [file embj0034-1630-sd17.pdf]

# Related to Supp Fig 2

## Supp Fig 2B

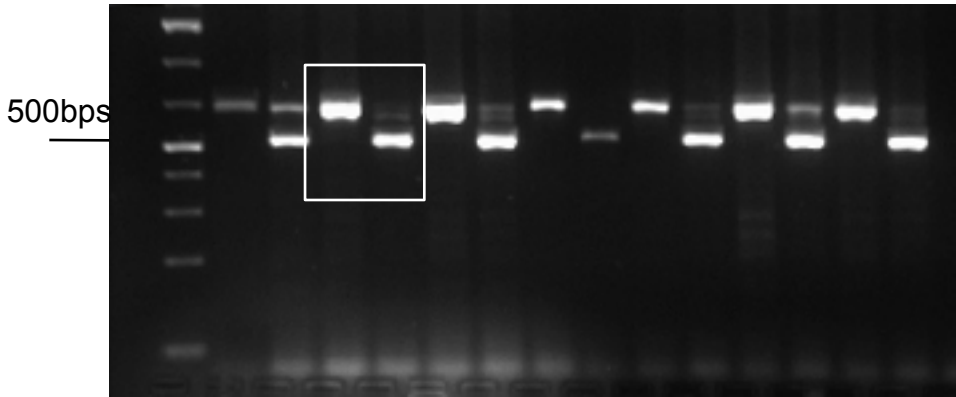

## Supp Fig 2C

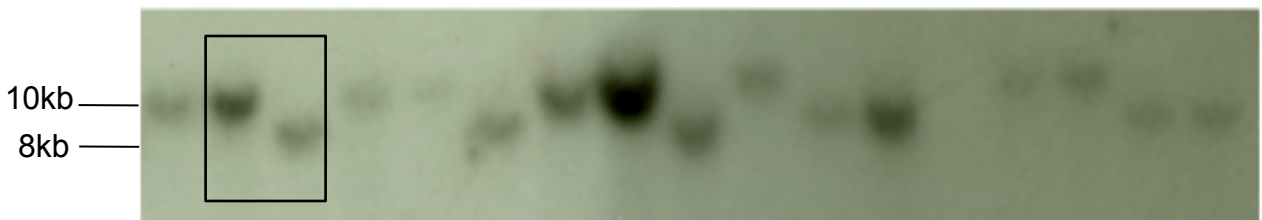

## Supp Fig 2D

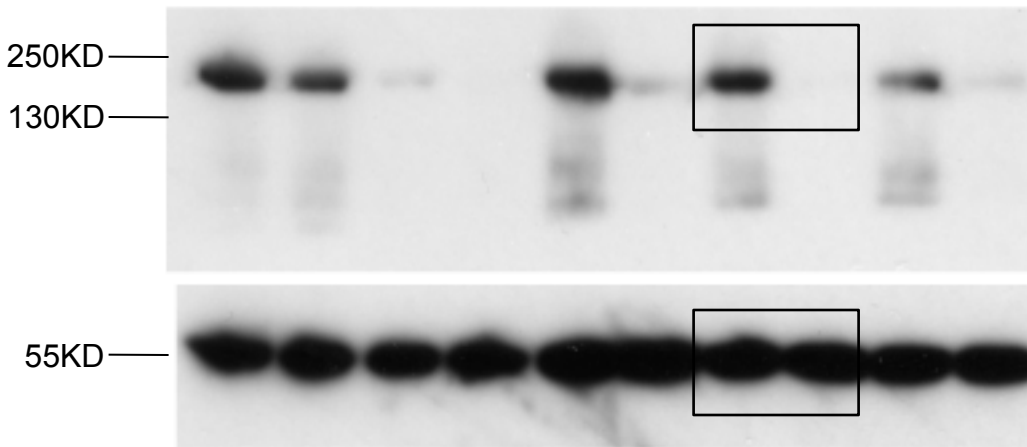

## Supp Fig 2E

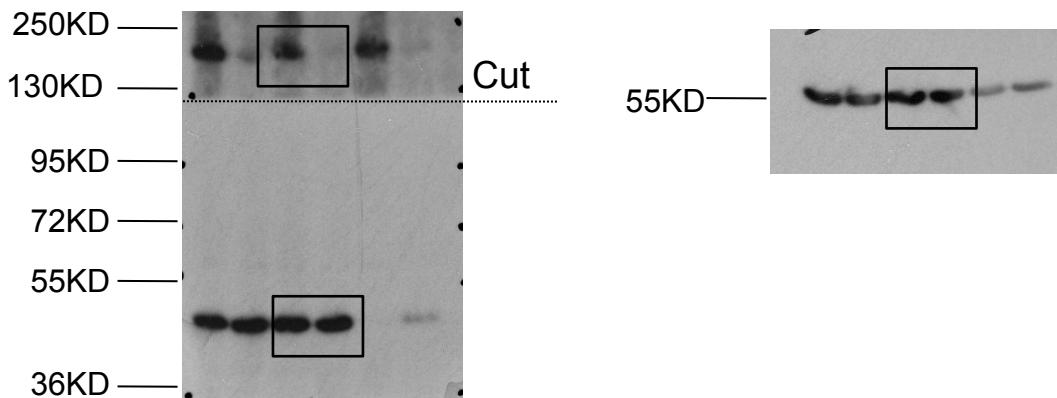

Supplement: embj0034-1630-sd7.pdf [file embj0034-1630-sd7.pdf]

# Related to Supp Fig 4

## Supp Fig 4A

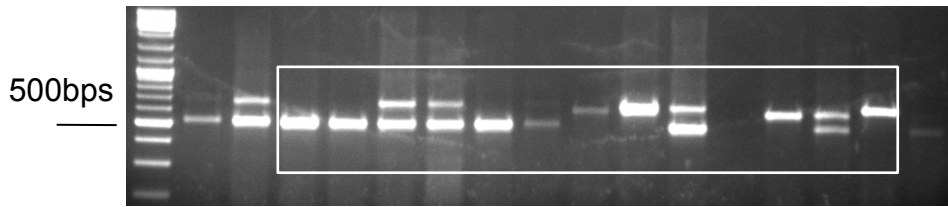

## Supp Fig 4B

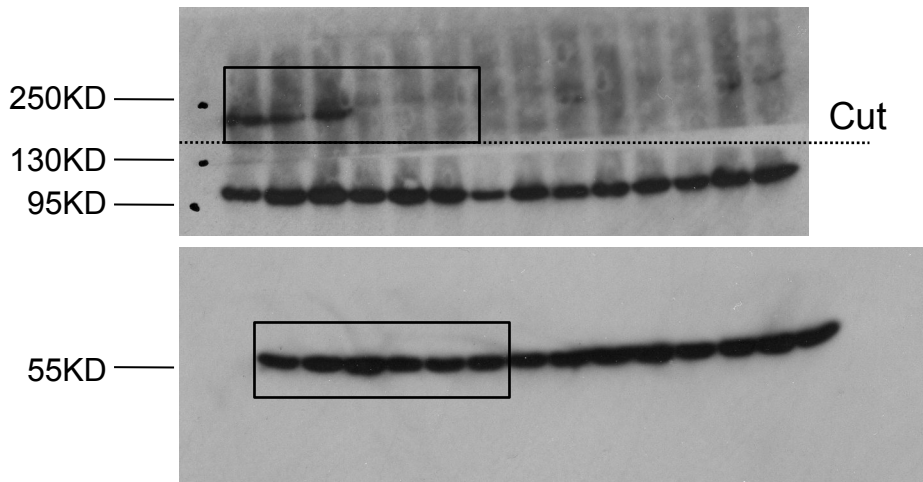

Supplement: embj0034-1630-sd8.pdf [file embj0034-1630-sd8.pdf]

# Related to Supp Fig 5

## Supp Fig 5C

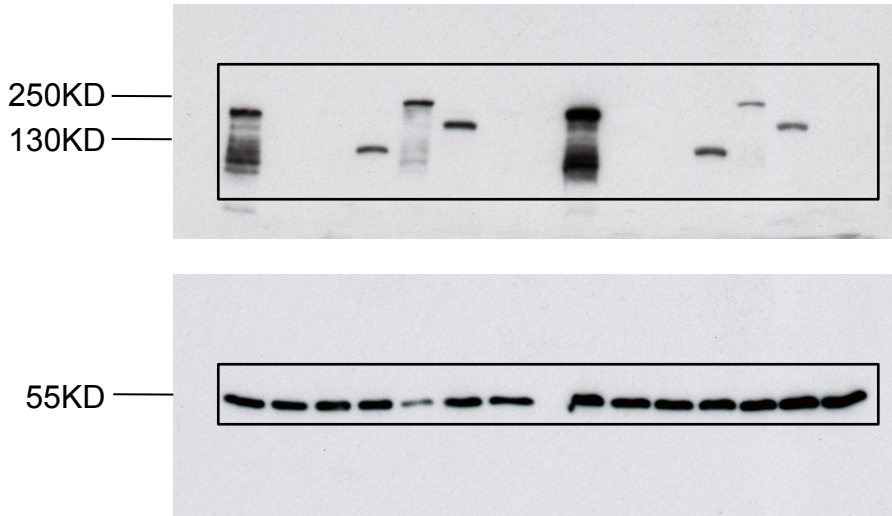

## Supp Fig 5D

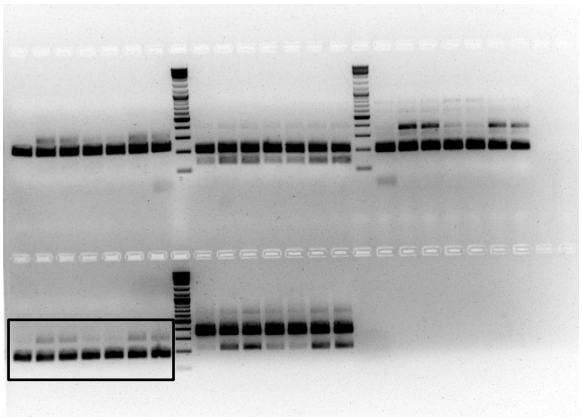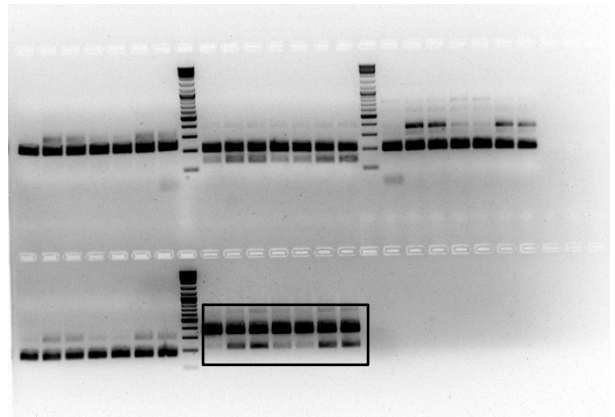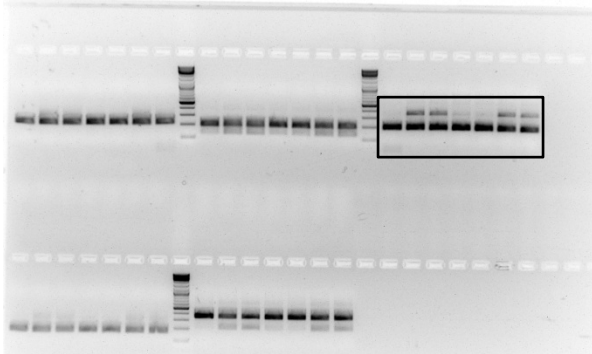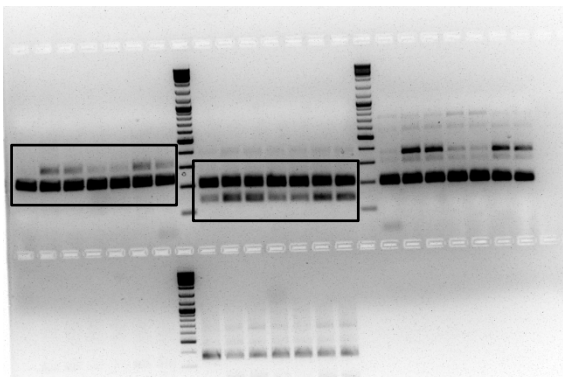

## Supp Fig 5H

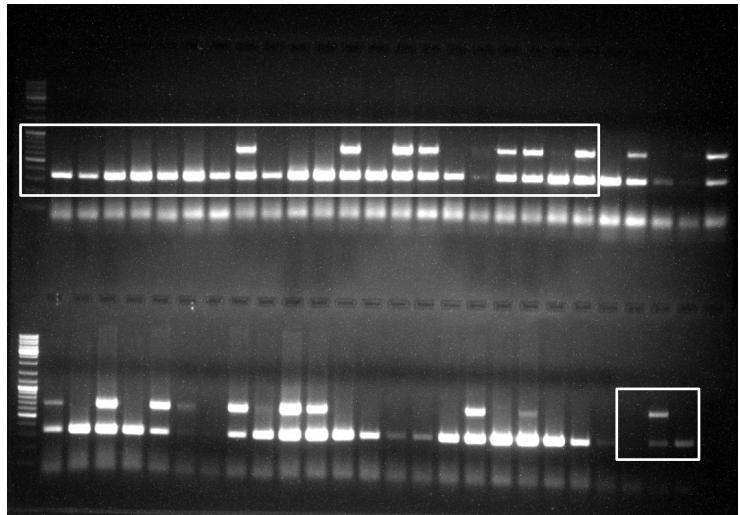

DNA marker, SM0331, Thermo Scientific

Supplement: embj0034-1630-sd9.pdf [file embj0034-1630-sd9.pdf]
